# Supplementary material for: Ionic liquid-supported 3DOM silica for efficient heterogeneous oxidative desulfurization
Source: Royal Society of Chemistry journal article supplement (doi:10.1039/c8qi00519b), 2018-01-01
Supplement: c8qi00519b1.pdf [file c8qi00519b1.pdf]

## **Ionic liquid-supported 3DOM Silica for efficient heterogeneous oxidative desulfurization**

Xiao Chen,<sup>a</sup> Ming Zhang,<sup>b\*</sup> Yanchen Wei,<sup>a</sup> Hongping Li,<sup>b</sup> Jiaqi Liu,<sup>b</sup> Qi Zhang,<sup>a\*</sup>

Wenshuai Zhu,<sup>a\*</sup> Huaming Li,<sup>b</sup>

<sup>a</sup> School of Chemistry and Chemical Engineering, Jiangsu University, Zhenjiang  
212013, P. R. China

<sup>b</sup> Institute for Energy Research, Jiangsu University, Zhenjiang 212013, P. R. China

\*Corresponding author: Tel.: +86-511-88799500; Fax: +86-511-88791708;

E-mail address: zm@ujs.edu.cn (M. Zhang); qzhang@ujs.edu.cn (Q. Zhang);

zhuws@ujs.edu.cn (W.S. Zhu);

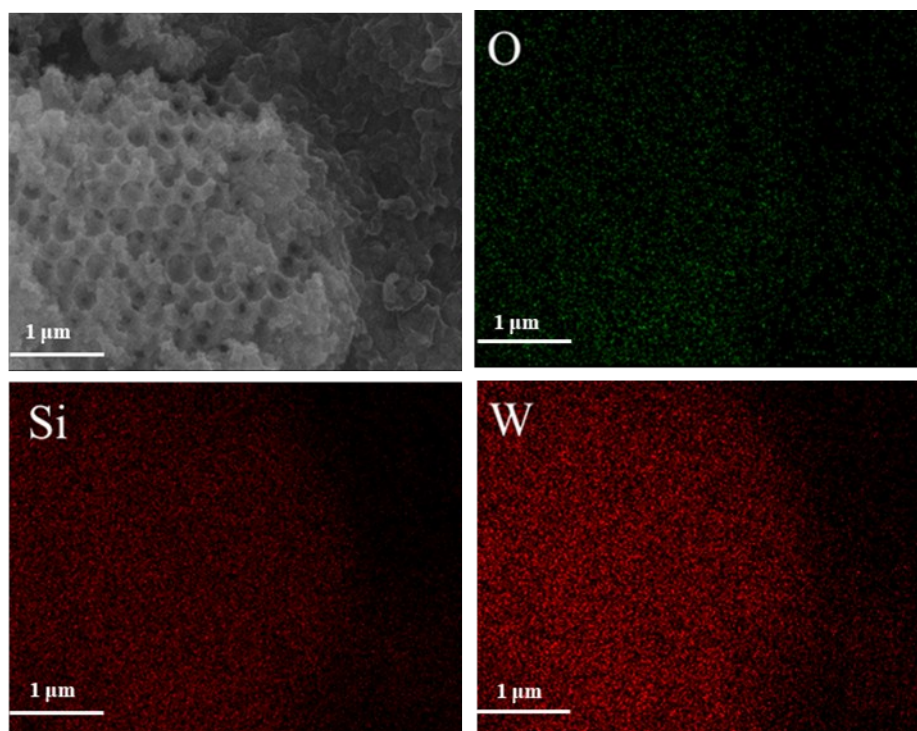

Fig. S1 EDS elemental mapping images of the IL-3DOM SiO<sub>2</sub> catalyst.

Table S1. Catalytic oxidative desulfurization performance of other tungsten-containing mesoporous silica systems reported.

| Entry | Catalyst                                                                     | O/S molar ratio | t/min | Sulfur removal/% | Recycle times | Ref.      |
|-------|------------------------------------------------------------------------------|-----------------|-------|------------------|---------------|-----------|
| 1     | C <sub>4</sub> -IL@OMS                                                       | 3               | 60    | 99.5             | 7             | 1         |
| 2     | Sw20-3.0                                                                     | 4               | 15    | 97.1             | 5             | 2         |
| 3     | 25wt% WO <sub>3</sub> /SBA-15                                                | 10              | 20    | 99               | 5             | 3         |
| 4     | 15% HPW-SPC                                                                  | 3               | 120   | 96.3             | 4             | 4         |
| 5     | PW-H <sub>3</sub> N <sup>+</sup> -SBA-15                                     | 62              | 120   | 100              | /             | 5         |
| 6     | 0.2W-SiO <sub>2</sub>                                                        | 3               | 30    | 100              | 9             | 6         |
| 7     | [Eu(PW <sub>11</sub> O <sub>39</sub> ) <sub>2</sub> ] <sup>11-</sup> @SBA-15 | 12              | 120   | 92               | 10            | 7         |
| 8     | 0.25W-CeO <sub>2</sub> -400                                                  | 5               | 50    | 99.2             | 3             | 8         |
| 9     | 550-WO <sub>3</sub> -SiO <sub>2</sub>                                        | 3               | 70    | 100              | 6             | 9         |
| 10    | HPW/SiO <sub>2</sub> -Al <sub>2</sub> O <sub>3</sub> (50)                    | 2               | 120   | 97               | 3             | 10        |
| 11    | LaW <sub>10</sub> /IL-SiO <sub>2</sub>                                       | 5               | 25    | >99              | 10            | 11        |
| 12    | HPW-TiO <sub>2</sub> -SiO <sub>2</sub> (1:3)                                 | 12              | 120   | 96               | 3             | 12        |
| 13    | IL-3DOM SiO <sub>2</sub>                                                     | 3               | 40    | 100              | 17            | This work |

1. M. Zhang, M. Li, Q. Chen, W. Zhu, H. Li, S. Yin, Y. Li and H. Li, *RSC Adv.*, 2015, **5**, 76048-76056.
2. D. Shen, Y. Dai, J. Han, L. Gan, J. Liu and M. Long, *Chem. Eng. J.*, 2018, **332**, 563-571.
3. J. González, J. A. Wang, L. F. Chen, M. E. Manríquez and J. M. Dominguez, *J. Phys. Chem. C*, 2017, **121**, 23988-23999.
4. B. Li, Z. Liu, C. Han, W. Ma and S. Zhao, *J. Colloid Interface Sci.*, 2012, **377**, 334-341.
5. X. N. Pham, D. L. Tran, T. D. Pham, Q. M. Nguyen, V. T. T. Thi and H. D. Van, *Adv. Powder Technol.*, 2018, **29**, 58-65.
6. W. Zhu, Q. Gu, J. Hu, P. Wu, S. Yin, F. Zhu, M. Zhang, J. Xiong and H. Li, *J. Porous Mater.*, 2015, **22**, 1227-1233.
7. S. O. Ribeiro, L. S. Nogueira, S. Gago, P. L. Almeida, M. C. Corvo, B. d. Castro, C. M. Granadeiro and S. S. Balula, *Appl. Catal., A*, 2017, **542**, 359-367.
8. Y. Li, M. Zhang, W. Zhu, M. Li, J. Xiong, Q. Zhang, Y. Wei and H. Li, *RSC Adv.*, 2016, **6**, 68922-68928.
9. S. Xun, W. Zhu, F. Zhu, Y. Chang, D. Zheng, Y. Qin, M. Zhang, W. Jiang and H. Li, *Chem. Eng. J.*, 2015, **280**, 256-264.
10. X.M. Yan, Z. Mei, P. Mei and Q. Yang, *J. Porous Mater.*, 2014, **21**, 729-737.
11. Y. Chen and Y.F. Song, *ChemPlusChem*, 2014, **79**, 304-309.
12. X.M. Yan, P. Mei, L. Xiong, L. Gao, Q. Yang and L. Gong, *Catal. Sci. Technol.*, 2013, **3**, 1985.

The ionic liquid that prepared via ion exchange method. The content of C, H, N element in the precursor is determined through elemental analyzer. The results and the theoretical value are shown as follows (Table S2).

Table S2. Elemental composition of the  $[C_{16}mim]_6H_2W_{12}O_{40}$  in wt%.

| Element             | C     | H    | N    |
|---------------------|-------|------|------|
| Actual value/%      | 30.15 | 5.08 | 3.33 |
| Theoretical value/% | 30.71 | 5.07 | 3.55 |

Table S3. The theoretical and actual content of the IL in the hybrid materials.

| Entry | Theoretical value (wt%) | Actual value <sup>a</sup> (wt%) |
|-------|-------------------------|---------------------------------|
| 1     | 24.3                    | 17.1                            |

<sup>a</sup>IL content based on the tungsten content measured by ICP-OES.
